# Supplementary material for: An on-demand femtoliter droplet dispensing system based on a gigahertz acoustic resonator
Source: Royal Society of Chemistry journal article supplement (doi:10.1039/c8lc00540k), 2018-01-01
Supplement: c8lc00540k1.pdf [file c8lc00540k1.pdf]

## Supporting Information

### A Femtoliter On-Demand Droplet Dispensing System Based on Gigahertz Acoustic Resonator

Meihang He,<sup>a</sup> Yangchao Zhou,<sup>a</sup> Weiwei Cui,<sup>a</sup> Yang Yang,<sup>a</sup> Hongxiang Zhang,<sup>a</sup> Xuejiao Chen,<sup>a</sup> Wei Pang,<sup>\*b</sup> and Xuexin Duan<sup>\*a</sup>

<sup>a</sup>State Key Laboratory of Precision Measuring Technology & Instruments, Tianjin University, Tianjin 300072, China.

<sup>b</sup>College of Precision Instrument and Optoelectronics Engineering, Tianjin University, Tianjin 300072, China.

\* Corresponding author. E-mail: [xduan@tju.edu.cn](mailto:xduan@tju.edu.cn) [weipang@tju.edu.cn](mailto:weipang@tju.edu.cn)

## Device fabrication

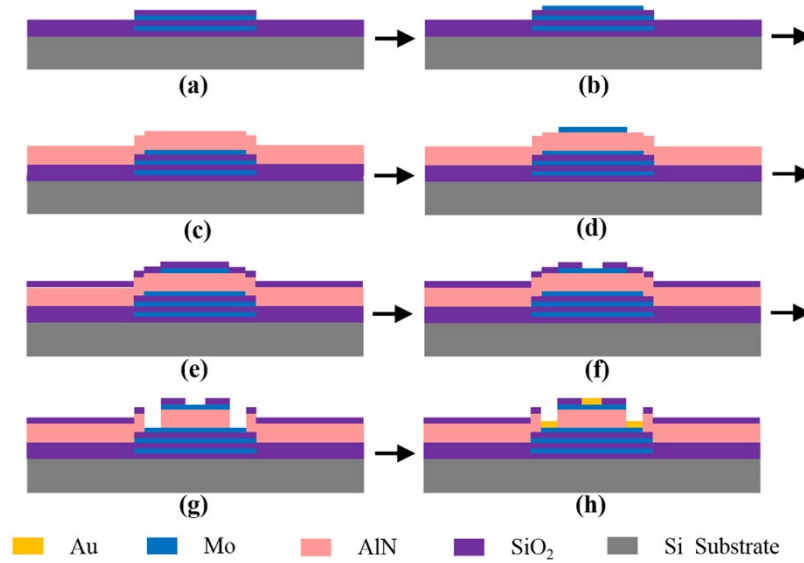

Figure S1 Device fabrication process. (a)-(b) Deposition and etching of bottom electrode. (b)-(c) Deposition of piezoelectric layer. (c)-(d) Deposition and etching of top electrode. (d)-(e) Deposition of SiO<sub>2</sub> passivation layer. (e)-(f) Etching the passivation layer to expose top electrode. (f)-(g) Etching the piezoelectric layer to expose bottom electrode. (g)-(h) Deposition and lift-off of Au electrode.

**Table S-1 Detail parameters and fabrication method for each layer of the resonator**

| Layer               | Material         | Thickness | Fabrication method        |
|---------------------|------------------|-----------|---------------------------|
| Passivation layer   | SiO <sub>2</sub> | 0.1 μm    | Chemical vapor deposition |
| Au electrode        | Au               | 3 μm      | Physical vapor deposition |
| Top electrode       | Mo               | 0.15 μm   | Magnetron sputtering      |
| Piezoelectric layer | AlN              | 1.1 μm    | Magnetron sputtering      |
| Bottom electrode    | Mo               | 0.17 μm   | Magnetron sputtering      |
| Bragg reflectors    | SiO <sub>2</sub> | 0.645 μm  | Chemical vapor deposition |
|                     | Mo               | 0.642 μm  | Magnetron sputtering      |
| Substrate           | Si               | 400 μm    |                           |

### Viscosity effect

To investigate the ability of the device for dispensing liquid droplets with high viscosity, liquid samples with different viscosity were prepared by mixing glycerol with ultra-pure water at different ratio. The printing results are shown in Fig. S2. The results clearly show that the acoustic device can handle liquids with a wide range of viscosity and liquid droplets with viscosity as high as 15.2 mPa•s were successfully printed.

| Volume Ratio of Glycerol | Viscosity (mPa•s) |                                                                                      |
|--------------------------|-------------------|--------------------------------------------------------------------------------------|
| 8%                       | 1.3               | 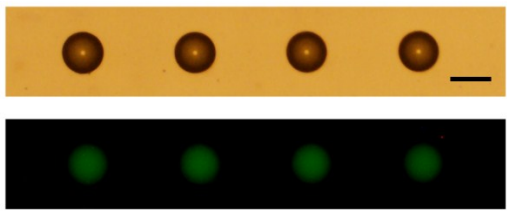   |
| 44%                      | 6.0               |   |
| 54%                      | 10.8              |  |
| 60%                      | 15.2              |  |

Figure S2 Printed droplets with varied viscosity. The results in each group consist of bright field photograph and fluorescent field photograph. The scale bar is 100  $\mu\text{m}$ .

### Cell printing

We also printed solution containing living cells and further treated with trypan blue (Fig. S3). It shows that cells can be successfully printed with retained bioactivity, since no cells get stained. Furthermore, it also shows that the device has potential in printing single cell array.

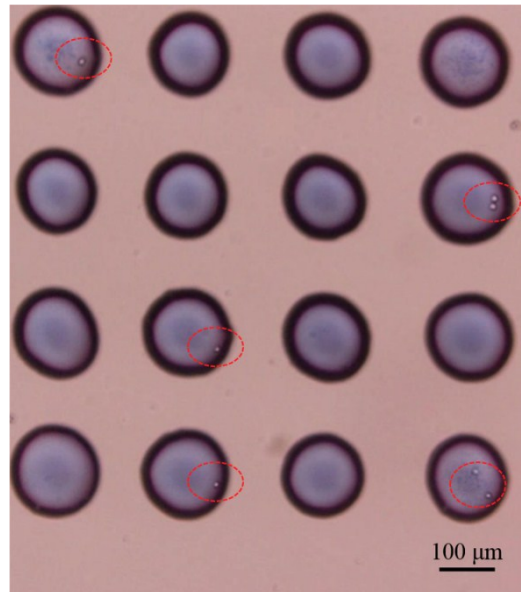

Figure S3 Printed droplet array with living HeLa cells and trypan blue. Cells are circled in red dash line.
